# Supplementary material for: Flavonoids from Sedum japonicum subsp. oryzifolium (Crassulaceae)
Source: MDPI journal article supplement (doi:10.3390/molecules27217632), 2022-11-07
Supplement: s1 [file s1]

## Supplementary data

### Flavonoids from *Sedum japonicum* subsp. *oryzifolium* (Crassulaceae)

Takayuki Mizuno<sup>1</sup>, Nahoko Uchiyama<sup>2</sup>, Seiji Tanaka<sup>2</sup>, Takahisa Nakane<sup>3</sup>, Kazumi Fujikawa<sup>4</sup>, Nobuo Kawahara<sup>4</sup> and Tsukasa Iwashina<sup>1,\*</sup>

<sup>1</sup>Department of Botany, National Museum of Nature and Science, 4-1-1 Amakubo, Tsukuba 305-0005, Japan; [iwashina@kahaku.go.jp](mailto:iwashina@kahaku.go.jp) (T.I.); [tmizuno@kahaku.go.jp](mailto:tmizuno@kahaku.go.jp) (T.M.)

<sup>2</sup>Division of Pharmacognosy, Phytochemistry and Narcotics/National Institute of Health Science (NHS), 3-25-26 Tonomachi, Kawasaki-ku, Kawasaki, Kanagawa 210-9501, Japan; [nuchiyama@nihs.go.jp](mailto:nuchiyama@nihs.go.jp) (N.U.); [seiji-tanaka@nihs.go.jp](mailto:seiji-tanaka@nihs.go.jp) (S.T.)

<sup>3</sup>Showa Pharmaceutical University, 3-3165 Higashi-tamagawagakuen, Machida, Tokyo 194-8543, Japan; [nakane@ac.shoyaku.ac.jp](mailto:nakane@ac.shoyaku.ac.jp) (T.N.)

<sup>4</sup>The Kochi Prefectural Makino Botanical Garden, 4200-6 Godaisan, Kochi 781-8125, Japan; [saussure@makino.or.jp](mailto:saussure@makino.or.jp) (K.F.); [kawahara@makino.or.jp](mailto:kawahara@makino.or.jp) (N.K.)

## Contents of Figures

Figure 1-1S. 800 MHz <sup>1</sup>H NMR spectrum of **3** in DMSO-*d*<sub>6</sub>

Figure 1-2S. 200 MHz <sup>13</sup>C NMR spectrum of **3** in DMSO-*d*<sub>6</sub>

Figure 1-3S. 800 MHz HMQC spectra of **3** in DMSO-*d*<sub>6</sub>

Figure 1-4S. 800 MHz HMBC spectrum of **3** in DMSO-*d*<sub>6</sub>

Figure 1-5S. 800 MHz COSY spectrum of **3** in DMSO-*d*<sub>6</sub>

Figure 1-6S. 800 MHz NOESY spectrum of **3** in DMSO-*d*<sub>6</sub>

Figure 2-1S. 800 MHz <sup>1</sup>H NMR spectrum of **4** in DMSO-*d*<sub>6</sub>

Figure 2-2S. 200 MHz <sup>13</sup>C NMR spectrum of **4** in DMSO-*d*<sub>6</sub>

Figure 2-3S. 800 MHz HMQC spectra of **4** in DMSO-*d*<sub>6</sub>

Figure 2-4S. 800 MHz HMBC spectrum of **4** in DMSO-*d*<sub>6</sub>

Figure 2-5S. 800 MHz COSY spectrum of **4** in DMSO-*d*<sub>6</sub>

Figure 3-1S. 800 MHz <sup>1</sup>H NMR spectrum of **6** in DMSO-*d*<sub>6</sub>

Figure 3-2S. 200 MHz <sup>13</sup>C NMR spectrum of **6** in DMSO-*d*<sub>6</sub>

Figure 3-3S. 800 MHz HMQC spectra of **6** in DMSO-*d*<sub>6</sub>

Figure 3-4S. 800 MHz HMBC spectrum of **6** in DMSO-*d*<sub>6</sub>

Figure 3-5S. 800 MHz COSY spectrum of **6** in DMSO-*d*<sub>6</sub>

Figure 3-6S. 800 MHz NOESY spectrum of **6** in DMSO-*d*<sub>6</sub>

Figure 4-1S. 800 MHz <sup>1</sup>H NMR spectrum of **7** in DMSO-*d*<sub>6</sub>

Figure 4-2S. 200 MHz  $^{13}\text{C}$  NMR spectrum of **7** in DMSO- $d_6$  Fig. 4-3S. 800 MHz HMQC spectra of **7** in DMSO- $d_6$  Fig. 4-4S. 800 MHz HMBC spectrum of **7** in DMSO- $d_6$  Fig. 4-5S. 800 MHz COSY spectrum of **7** in DMSO- $d_6$  Fig. 5-1S. 800 MHz  $^1\text{H}$  NMR spectrum of **8** in DMSO- $d_6$  Fig. 5-2S. 200 MHz  $^{13}\text{C}$  NMR spectrum of **8** in DMSO- $d_6$  Fig. 5-3S. 800 MHz HMQC spectra of **8** in DMSO- $d_6$  Fig. 5-4S. 800 MHz HMBC spectrum of **8** in DMSO- $d_6$  Fig. 5-5S. 800 MHz COSY spectrum of **8** in DMSO- $d_6$  Fig. 5-6S. 800 MHz NOESY spectrum of **8** in DMSO- $d_6$

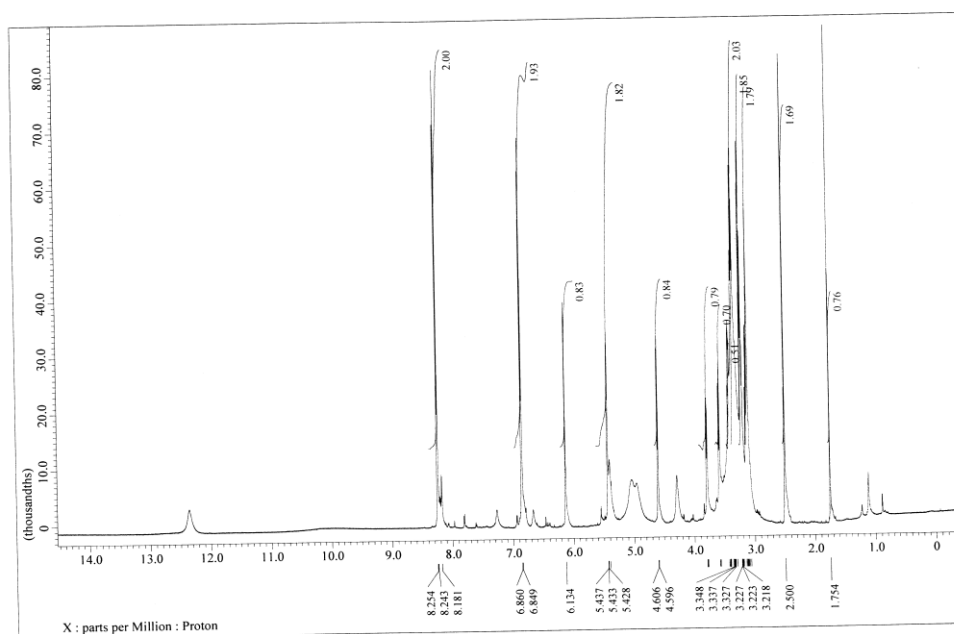

Figure 1-1S. 800 MHz  $^1\text{H}$  NMR spectrum of **3** in DMSO- $d_6$ .

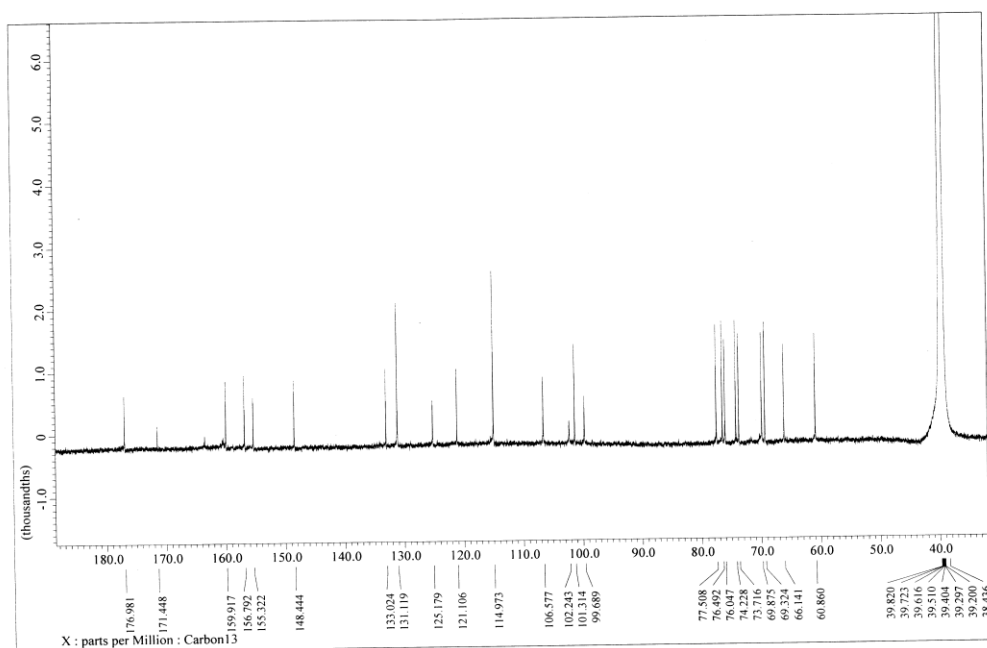

Figure 1-2S. 200 MHz  $^{13}\text{C}$  NMR spectrum of **3** in  $\text{DMSO}-d_6$

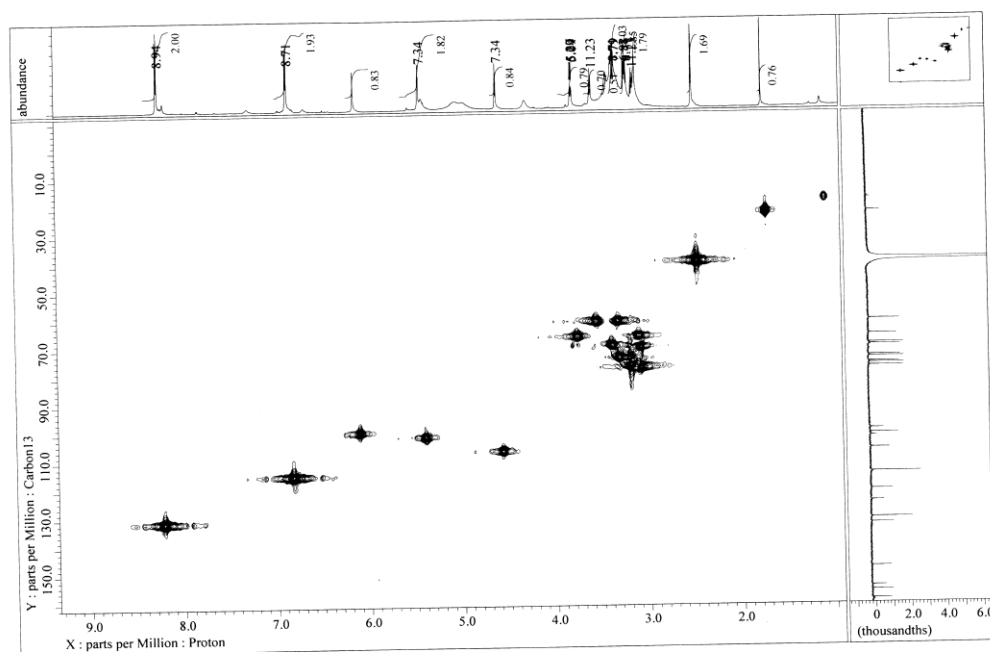

Figure 1-3S. 800 MHz HMQC spectra of **3** in  $\text{DMSO}-d_6$



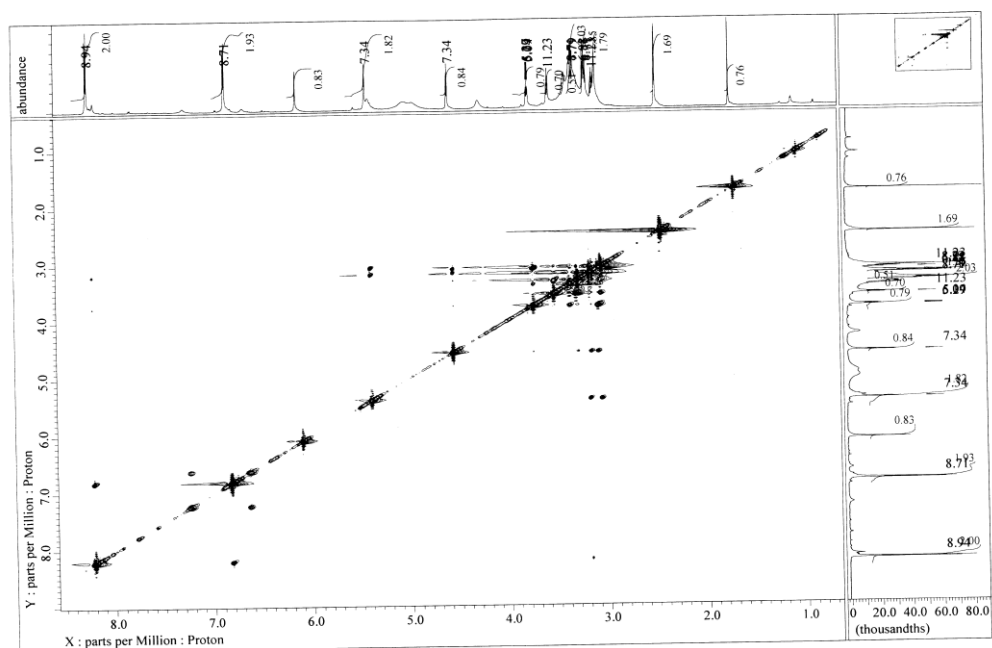

Figure 1-6S. 800 MHz NOESY spectrum of **3** in DMSO- $d_6$

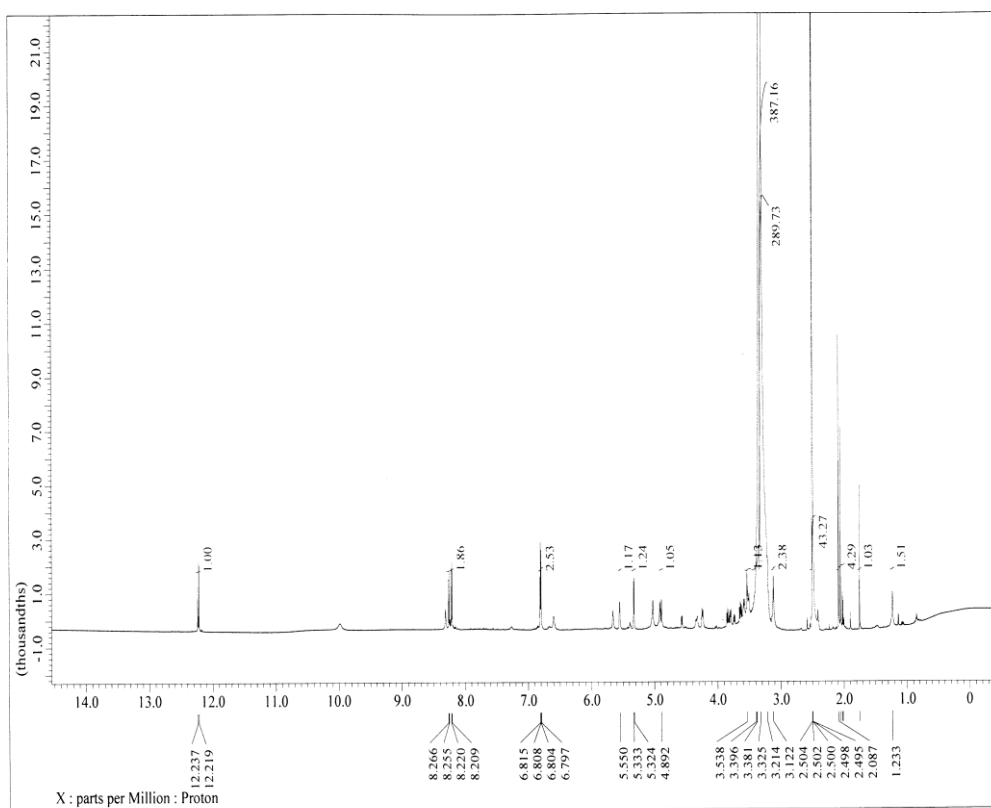

Figure 2-1S. 800 MHz  $^1\text{H}$  NMR spectrum of **4** in DMSO- $d_6$

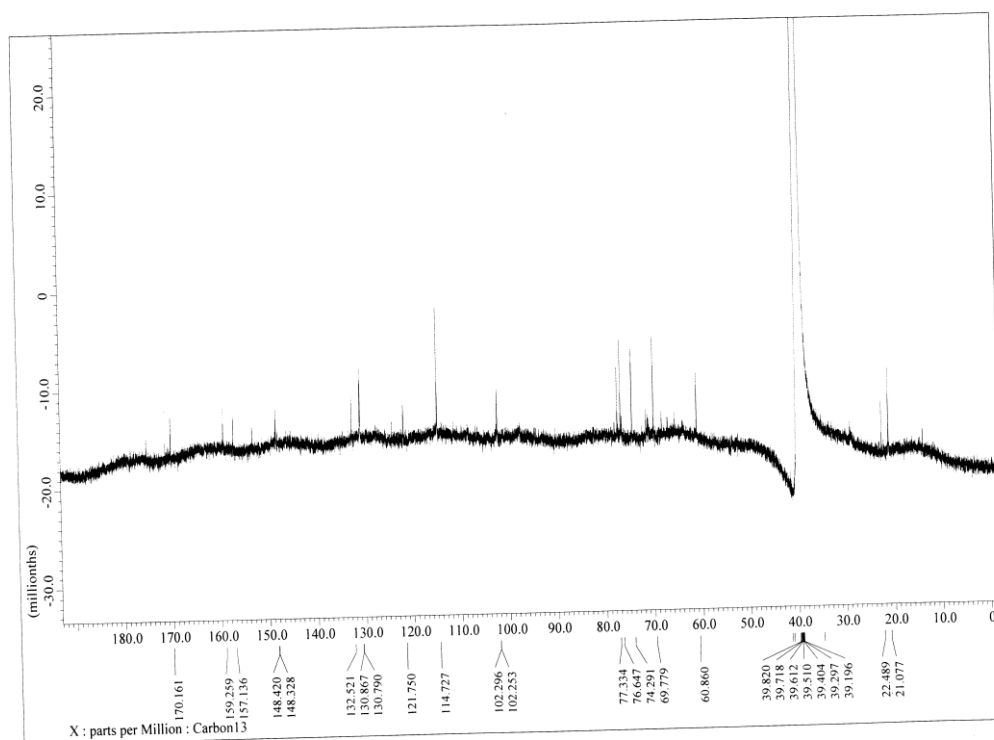

Figure 2-2S. 800 MHz  $^{13}\text{C}$  NMR spectrum of **4** in  $\text{DMSO}-d_6$

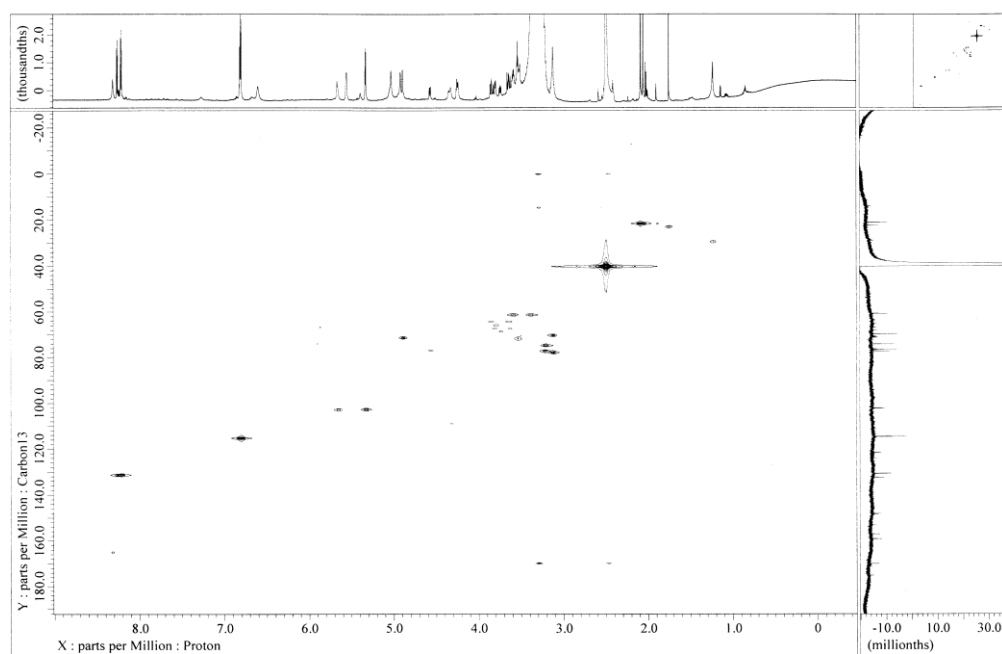

Figure 2-3S. 800 MHz HMQC spectra of **4** in  $\text{DMSO}-d_6$

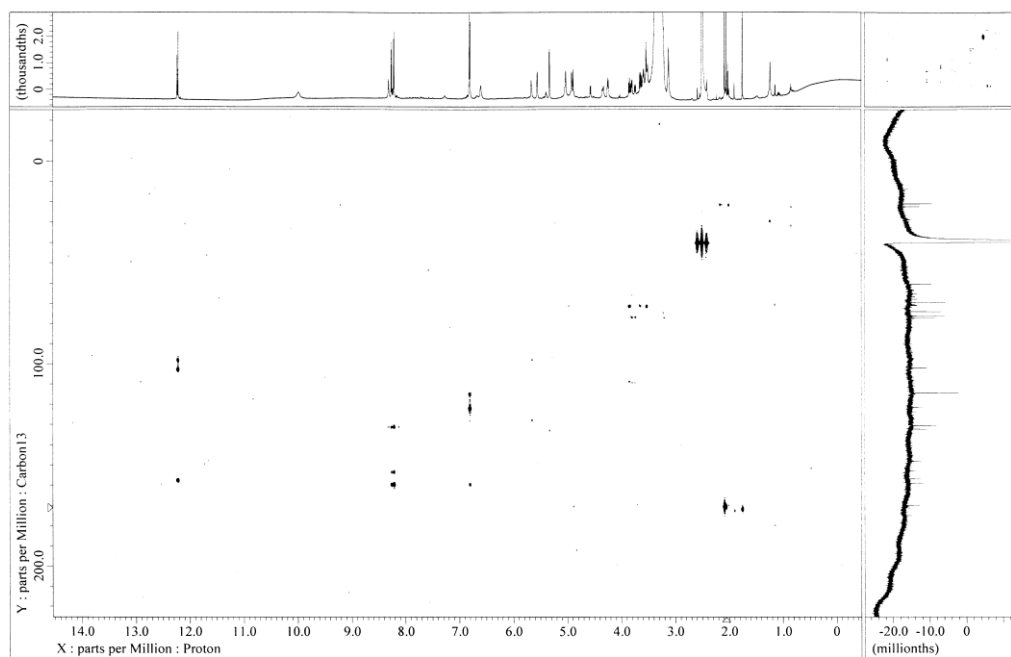

Figure 2-4S. 800 MHz HMBC spectrum of **4** in DMSO-*d*<sub>6</sub>

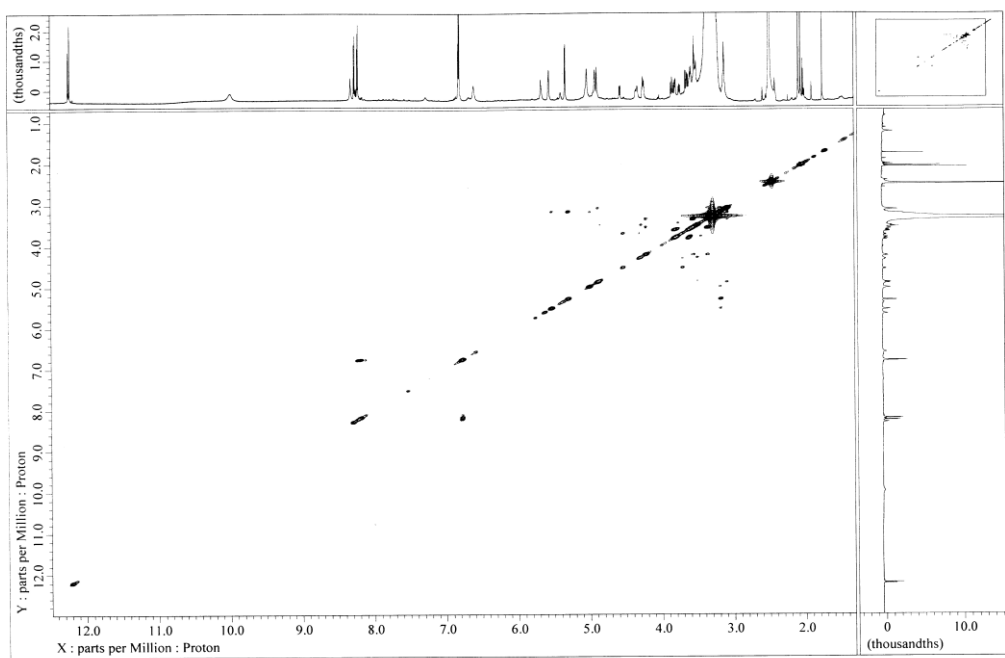

Figure 2-5S. 800 MHz COSY spectrum of **4** in DMSO-*d*<sub>6</sub>

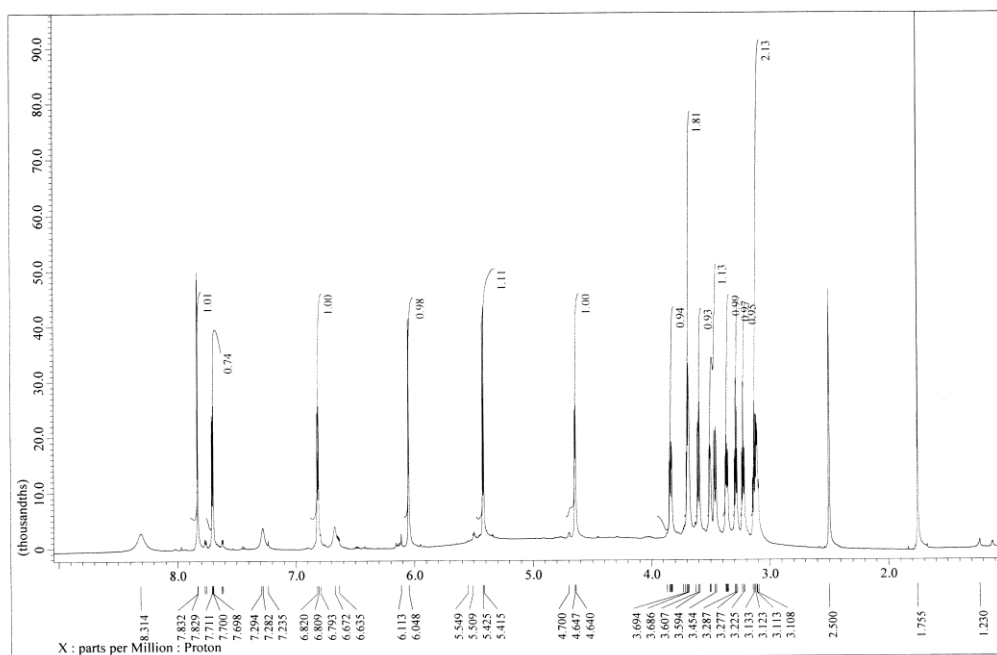

Figure 3-1S. 800 MHz  $^1\text{H}$  NMR spectrum of **6** in  $\text{DMSO}-d_6$

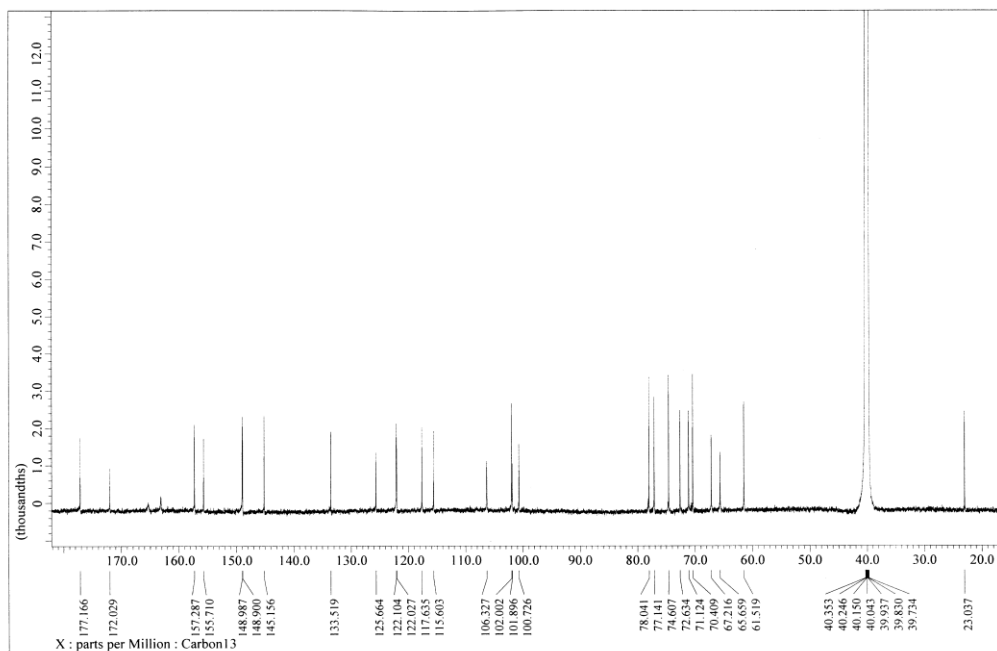

Figure 3-2S. 200 MHz  $^{13}\text{C}$  NMR spectrum of **6** in  $\text{DMSO}-d_6$



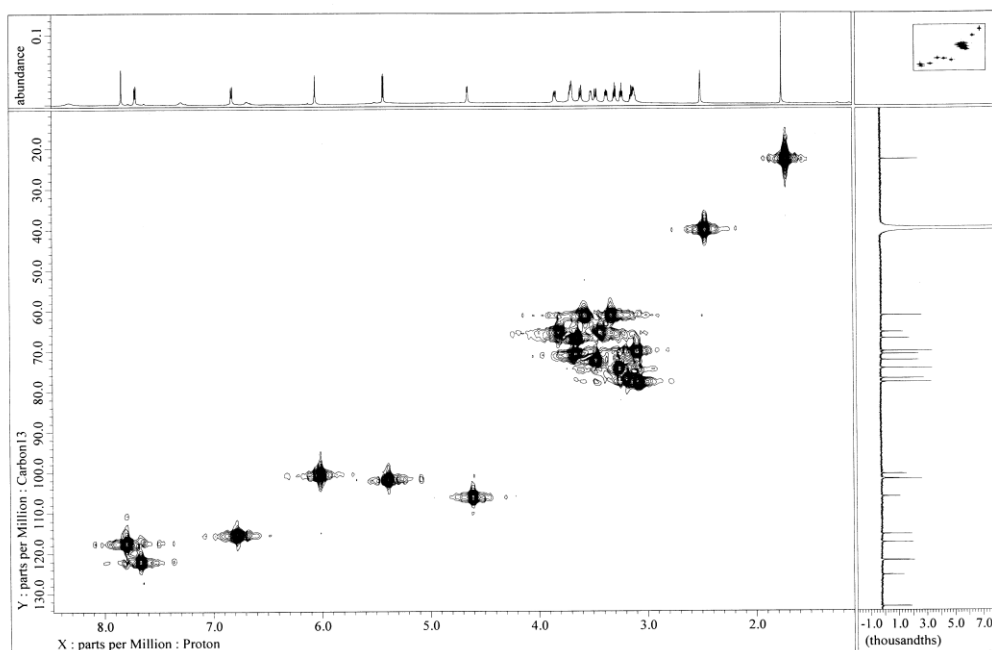

Figure 3-3S. 800 MHz HMQC spectra of **6** in DMSO-*d*<sub>6</sub>

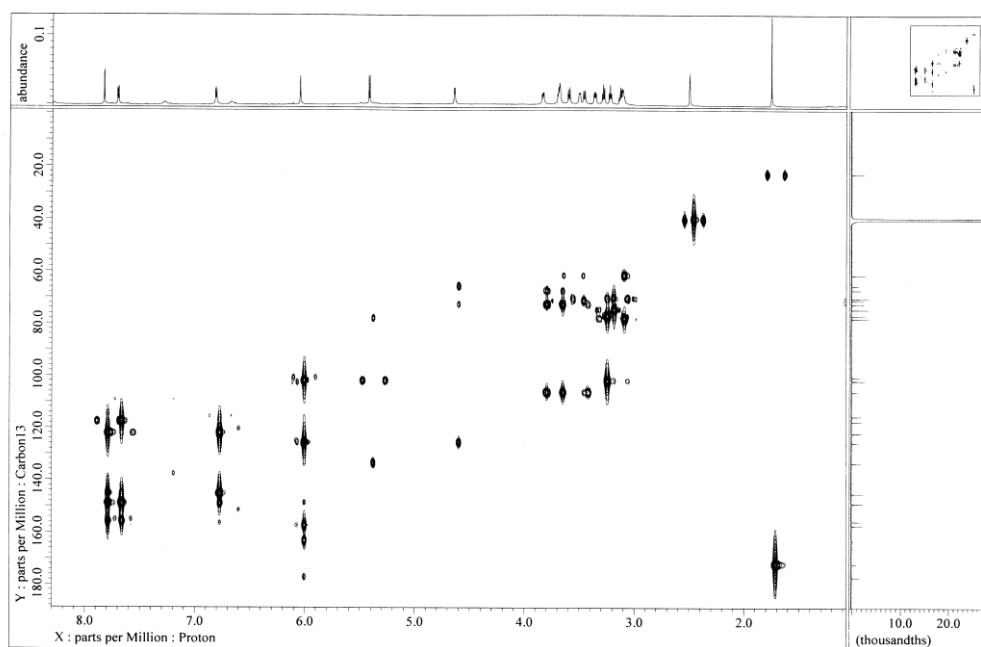

Figure 3-4S. 800 MHz HMBC spectrum of **6** in DMSO-*d*<sub>6</sub>

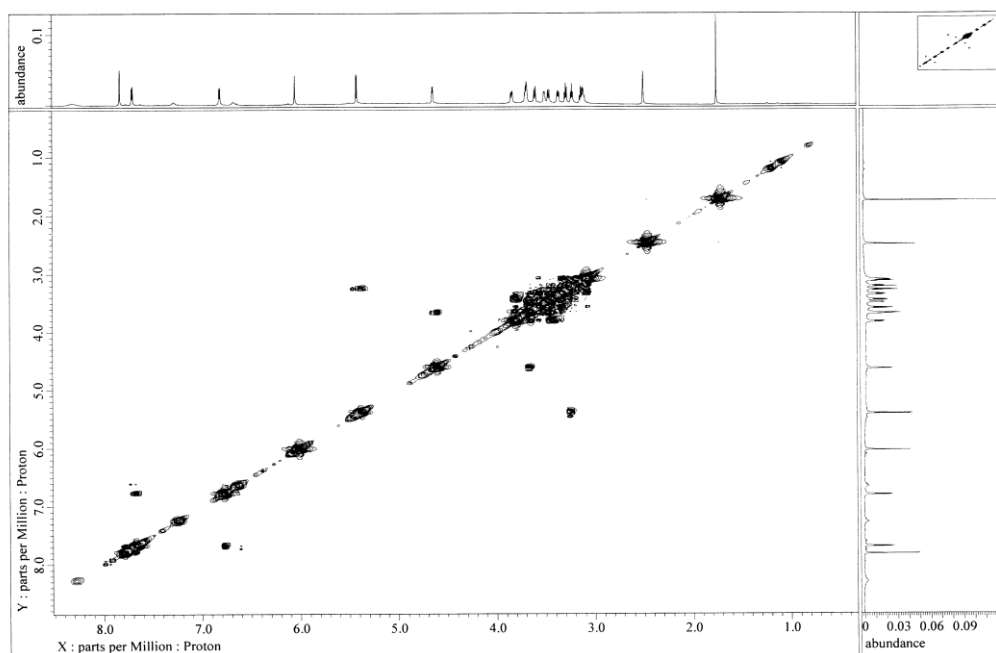

Figure 3-5S. 800 MHz COSY spectrum of **6** in DMSO-*d*<sub>6</sub>

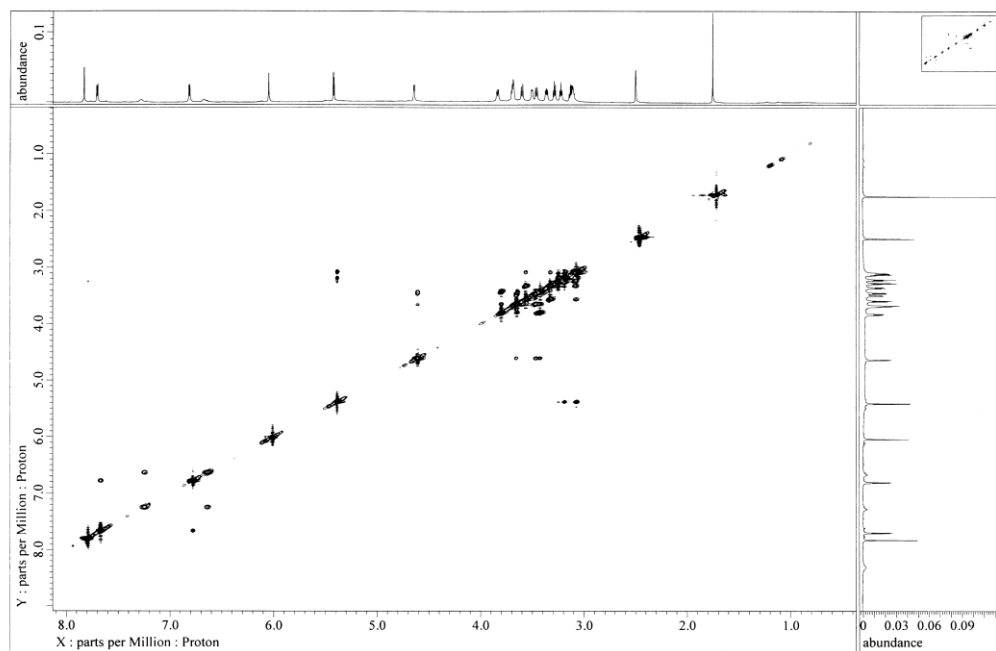

Figure 3-6S. 800 MHz NOESY spectrum of **6** in DMSO-*d*<sub>6</sub>

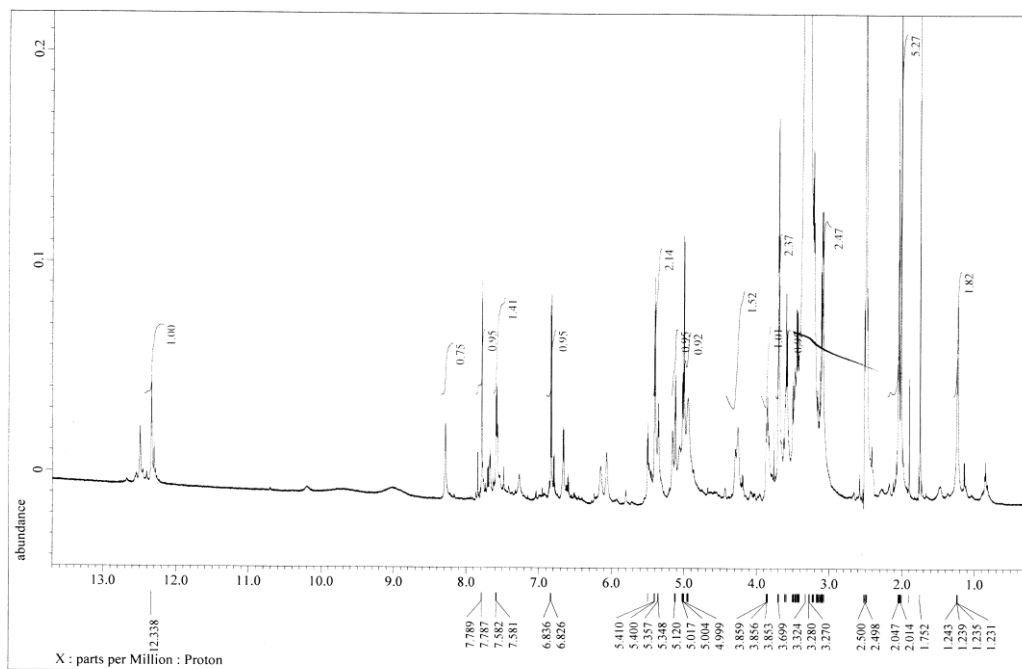

Figure 4-1S. 800 MHz  $^1\text{H}$  NMR spectrum of **7** in  $\text{DMSO}-d_6$

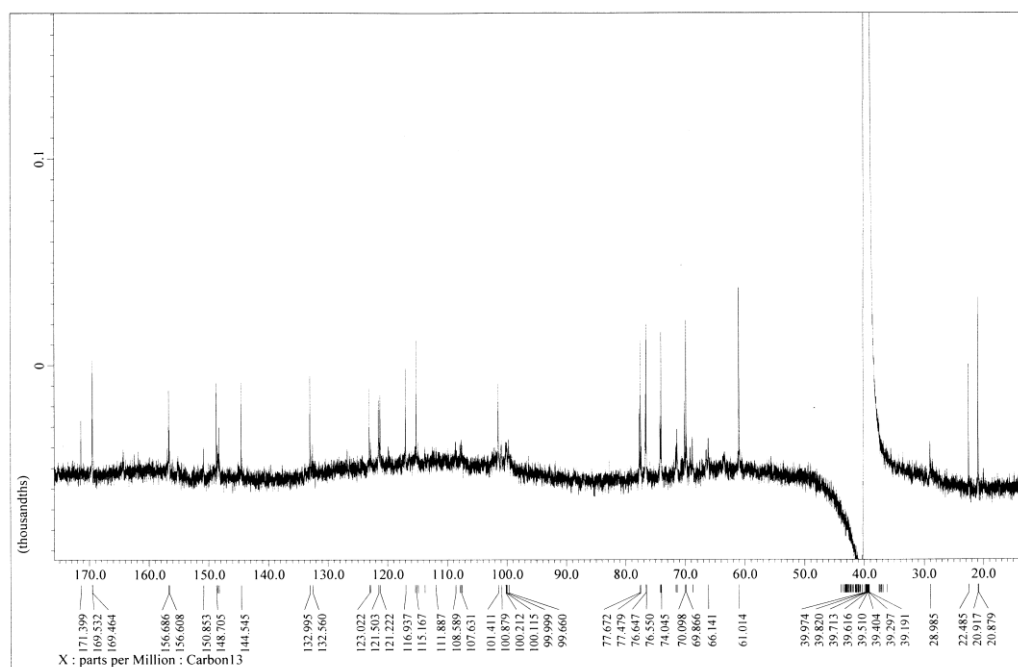

Figure 4-2S. 200 MHz  $^{13}\text{C}$  NMR spectrum of **7** in  $\text{DMSO}-d_6$

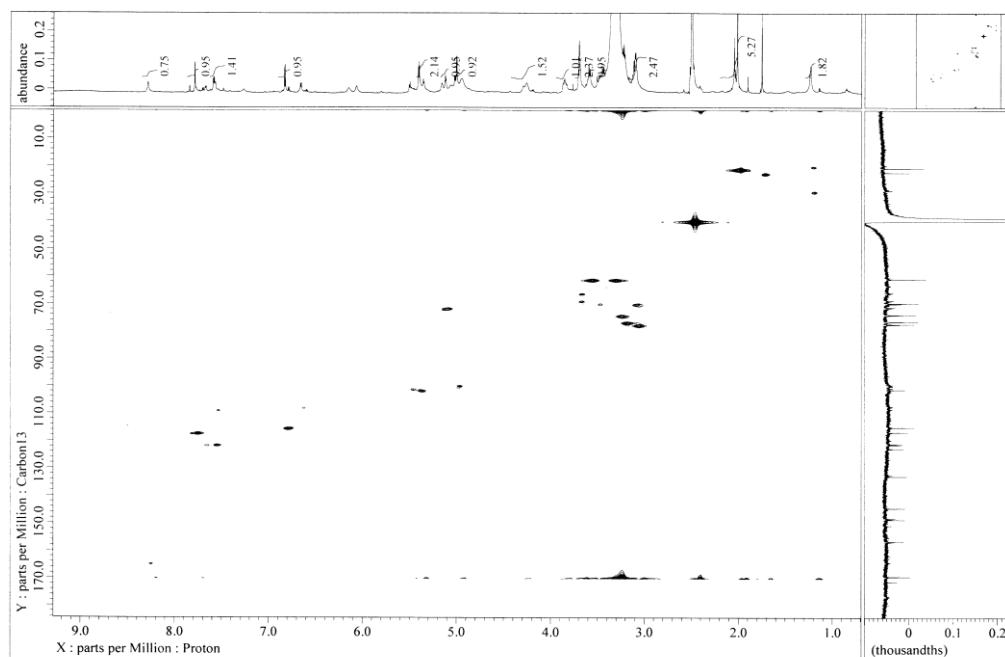

Figure 4-3S. 800 MHz HMQC spectra of **7** in DMSO- $d_6$

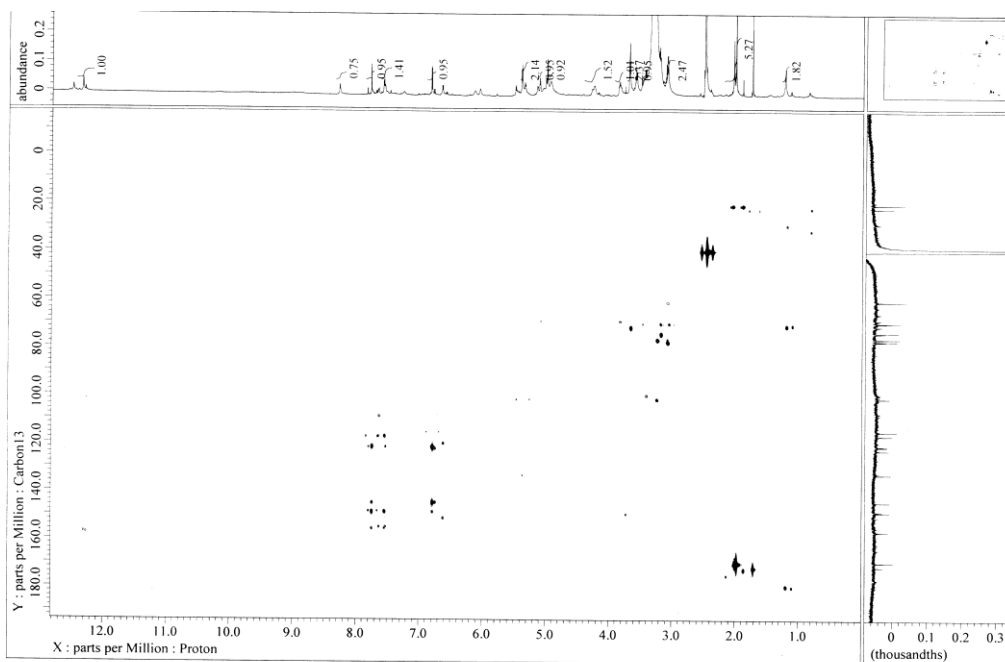

Figure 4-4S. 800 MHz HMBC spectrum of **7** in DMSO- $d_6$

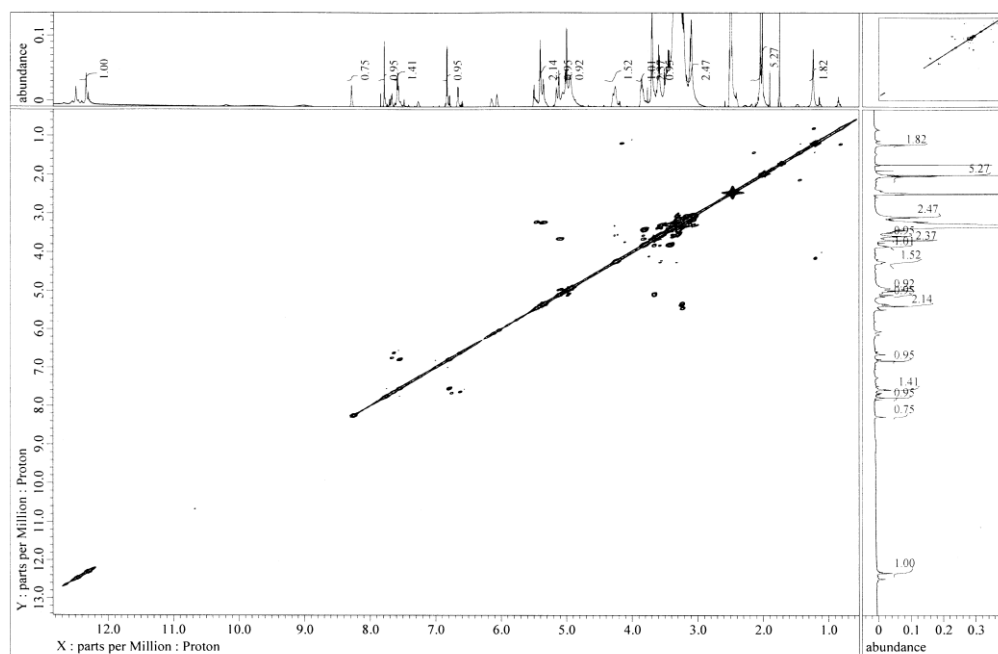

Figure 4-5S. 800 MHz COSY spectrum of **7** in DMSO- $d_6$

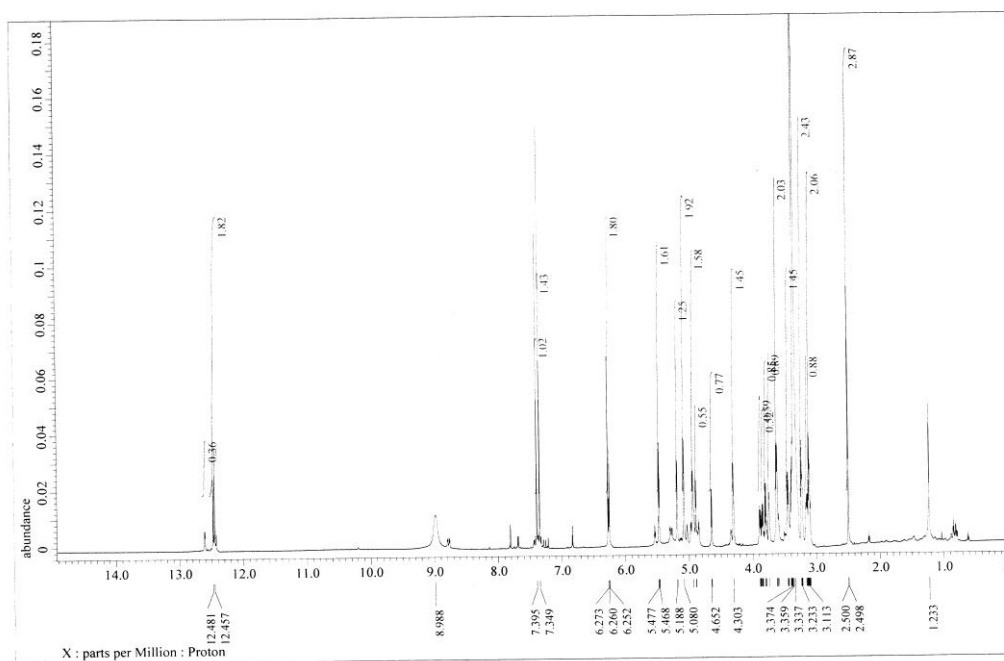

Figure 5-1S. 800 MHz  $^1\text{H}$  NMR spectrum of **8** in DMSO- $d_6$

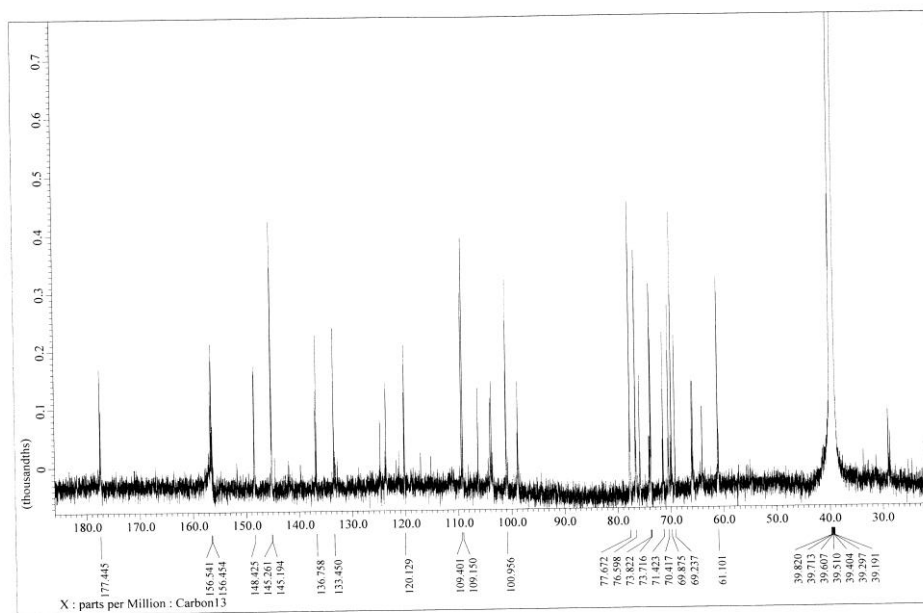

Figure 5-2S. 200 MHz  $^{13}\text{C}$  NMR spectrum of **8** in  $\text{DMSO}-d_6$

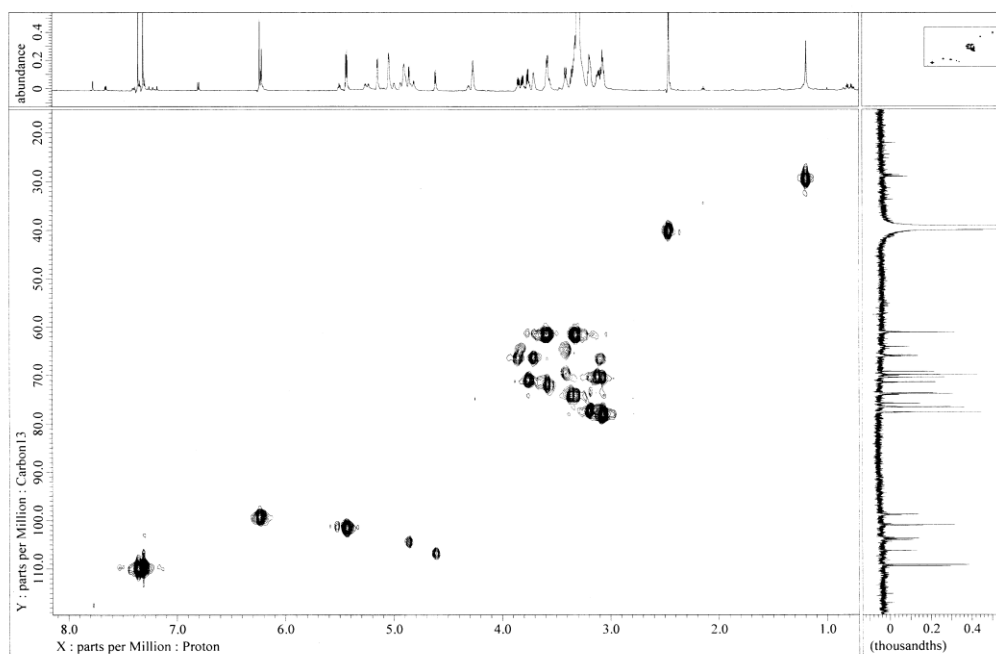

Figure 5-3S. 800 MHz HMQC spectra of **8** in  $\text{DMSO}-d_6$



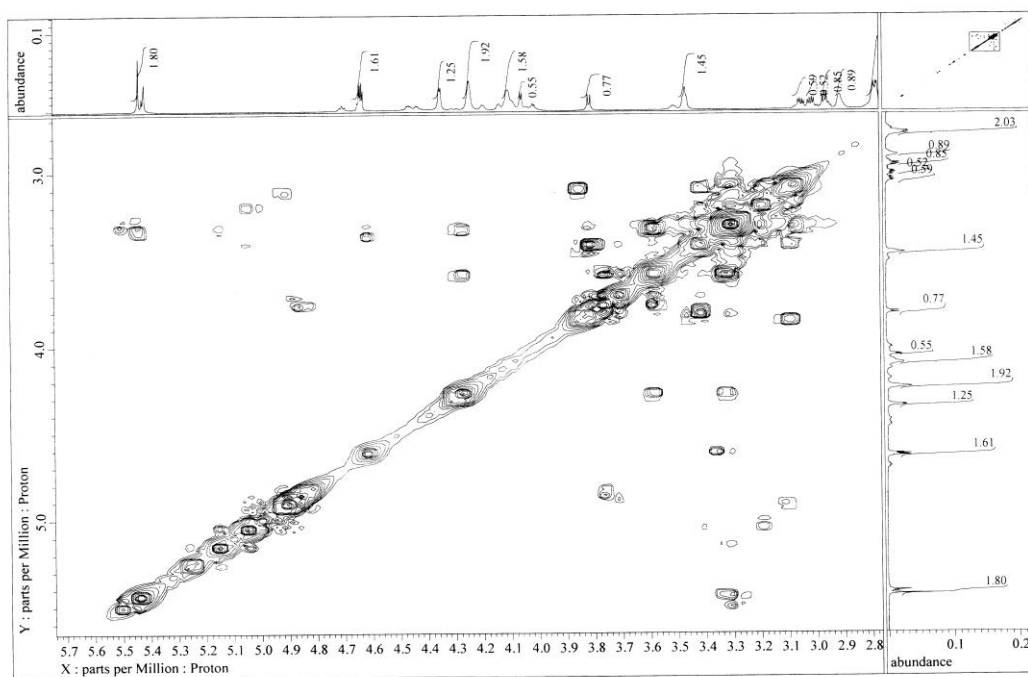

Figure 5-6S. 800 MHz NOESY spectrum of **8** in DMSO- $d_6$
